# Supplementary material for: Cytokine mRNA Degradation in Cardiomyocytes Restrains Sterile Inflammation in Pressure-Overloaded Hearts
Source: PubMed Central journal article supplement (PMC7034406; doi:10.1161/circulationaha.119.044582), 2020-01-14
Supplement: cir-141-667-s001.pdf [file cir-141-667-s001.pdf]

## **SUPPLEMENTAL MATERIAL**

**Supplemental Table I. Physiological and echocardiographic parameters in 10- to 12-week-old *Reg1<sup>+/+</sup>* and *Reg1<sup>-/-</sup>* mice at baseline.**

|                           | <i>Reg1<sup>+/+</sup></i> (N=6) | <i>Reg1<sup>-/-</sup></i> (N=5) |
|---------------------------|---------------------------------|---------------------------------|
| Body weight (g)           | 28.5 ± 0.8                      | 28.8 ± 1.2                      |
| Blood pressure (mmHg)     | 106 ± 6                         | 112 ± 3                         |
| Heart rate (bpm)          | 726 ± 10                        | 719 ± 8                         |
| Heart weight / TL (mg/mm) | 8.5 ± 0.2                       | 9.1 ± 0.3                       |
| Lung weight / TL (mg/mm)  | 8.7 ± 0.2                       | 8.7 ± 0.3                       |
| Liver weight / TL (mg/mm) | 85.6 ± 3.4                      | 77.3 ± 7.5                      |
| TL (mm)                   | 17.1 ± 0.1                      | 17.1 ± 0.2                      |
| IVSd (mm)                 | 0.77 ± 0.02                     | 0.78 ± 0.02                     |
| LVIDd (mm)                | 3.27 ± 0.08                     | 3.20 ± 0.06                     |
| LVIDs (mm)                | 1.72 ± 0.07                     | 1.69 ± 0.04                     |
| LVPWd (mm)                | 0.75 ± 0.02                     | 0.78 ± 0.02                     |
| FS (%)                    | 47.57 ± 1.30                    | 47.22 ± 0.71                    |

TL, tibia length; IVSd, end-diastolic interventricular septum thickness; LVIDd, end-diastolic left ventricular internal dimension; LVIDs, end-systolic left ventricular internal dimension; LVPWd, end-diastolic left ventricular posterior wall thickness; FS, fractional shortening. Data are mean ± SEM. Paired data were evaluated by Student's *t*-test.

**Supplemental Table II. Body weight, blood pressure and echocardiographic parameters in 10-week-old C57BL/6 mice 1 week after infection of AAV9 encoding eGFP or Regnase-1.**

|                       | eGFP-AAV9 (N=11) | Reg1-AAV9 (N=15) |
|-----------------------|------------------|------------------|
| Body weight (g)       | 26.2 ± 0.5       | 26.1 ± 0.4       |
| Blood pressure (mmHg) | 121 ± 5          | 119 ± 4          |
| Heart rate (bpm)      | 735 ± 4          | 713 ± 8          |
| IVSd (mm)             | 0.71 ± 0.01      | 0.72 ± 0.01      |
| LVIDd (mm)            | 3.25 ± 0.04      | 3.19 ± 0.05      |
| LVIDs (mm)            | 1.71 ± 0.02      | 1.66 ± 0.05      |
| LVPWd (mm)            | 0.71 ± 0.01      | 0.71 ± 0.01      |
| FS (%)                | 47.22 ± 0.82     | 48.08 ± 0.83     |

The C57BL/6 mice infected with AAV9 expressing eGFP (eGFP-AAV9) or Regnase-1 (Reg1-AAV9). IVSd, end-diastolic interventricular septum thickness; LVIDd, end-diastolic left ventricular internal dimension; LVIDs, end-systolic left ventricular internal dimension; LVPWd, end-diastolic left ventricular posterior wall thickness; FS, fractional shortening. Data are mean ± SEM. Paired data were evaluated by Student's *t*-test.

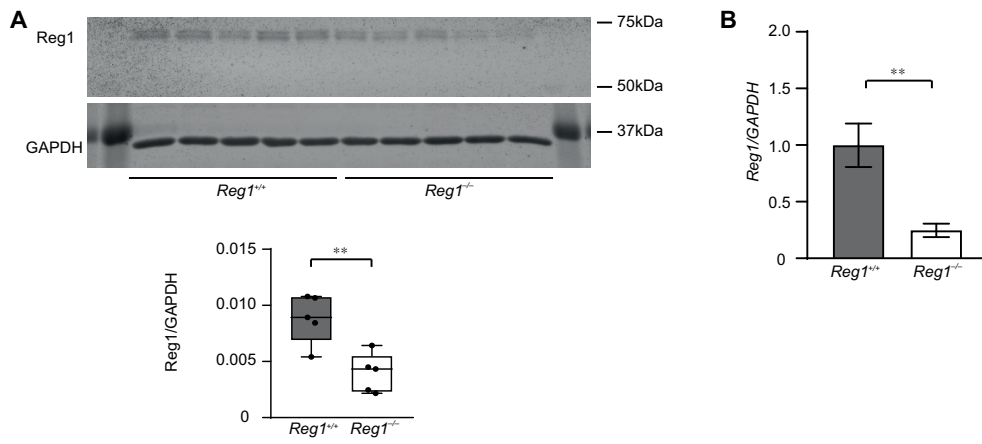

**Supplemental Figure I. Regnase-1 expression levels in *Reg1*<sup>+/+</sup> and *Reg1*<sup>-/-</sup> hearts.**

Data are mean  $\pm$  SEM. \*\* $P < 0.01$ . **A**, Western blot analysis of Regnase-1 (Reg1) protein in hearts (N=5). GAPDH was used as the loading control. The bottom graph shows densitometric analysis. **B**, mRNA expression of *Regnase-1* in cardiomyocytes. The averaged value for *Reg1*<sup>+/+</sup> cardiomyocytes was set equal to 1. N=6 (*Reg1*<sup>+/+</sup>) or N=7 (*Reg1*<sup>-/-</sup>). *Gapdh* mRNA was used as the loading control.

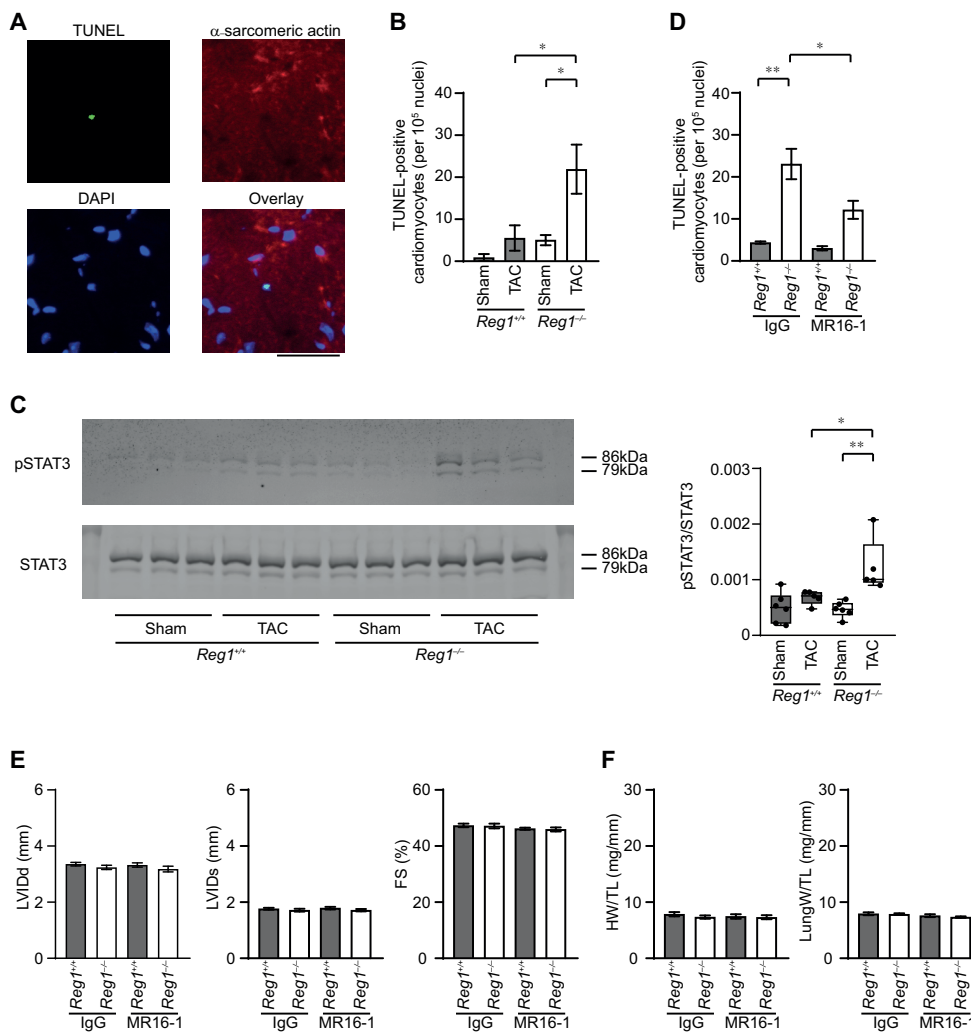

**Supplemental Figure II. Apoptotic cardiomyocyte cell death in  $Reg1^{-/-}$  hearts 4 weeks after TAC and effect of IL-6 blockade using the monoclonal anti-IL6 receptor antibody on apoptosis in  $Reg1^{-/-}$  hearts 4 weeks after TAC.**

Data are mean  $\pm$  SEM. \* $P < 0.05$ , \*\* $P < 0.01$ . **A**, Images of apoptotic cardiomyocytes. Triple staining of mouse hearts with DAPI (blue), anti- $\alpha$ -sarcomeric actin antibody (red) and TUNEL (green). Overlay image shows a TUNEL-positive nucleus in a cardiomyocyte. Scale bar, 100  $\mu$ m. **B**, The number of TUNEL-positive cardiomyocytes in sham- or TAC-operated  $Reg1^{+/+}$  or  $Reg1^{-/-}$  mice (N=3). **C**, Protein expression levels of phosphorylated and total STAT3 in sham- or TAC-operated  $Reg1^{+/+}$  or  $Reg1^{-/-}$  mice. N=6 (sham- $Reg1^{+/+}$ ), 5 (TAC- $Reg1^{+/+}$ ), 6 (sham- $Reg1^{-/-}$ ) or 5 (TAC- $Reg1^{-/-}$ ) per group. The right graph shows densitometric analysis. **D**, The number of TUNEL-positive cardiomyocytes in TAC-operated  $Reg1^{+/+}$  or  $Reg1^{-/-}$  mice treated with anti-mouse IL-6 receptor antibody MR16-1 or control IgG (N=3). **E and F**, After sham operation,  $Reg1^{+/+}$  and  $Reg1^{-/-}$  mice received an intraperitoneal injection of anti-mouse IL-6 receptor antibody MR16-1 or control IgG. Afterwards they were injected intraperitoneally once a week with a total of three injections with either MR16-1 or IgG. The mice were analyzed 4 weeks after surgery. Data were evaluated by one-way ANOVA with the Bonferroni's post hoc test. Data are mean  $\pm$  SEM. \* $P < 0.05$ . Echocardiographic (**E**) and physiological (**F**) parameters. N=6 (IgG- $Reg1^{+/+}$ ), 5 (IgG- $Reg1^{-/-}$ ), 6 (MR16-1- $Reg1^{+/+}$ ) or 6 (MR16-1- $Reg1^{-/-}$ ) per group.

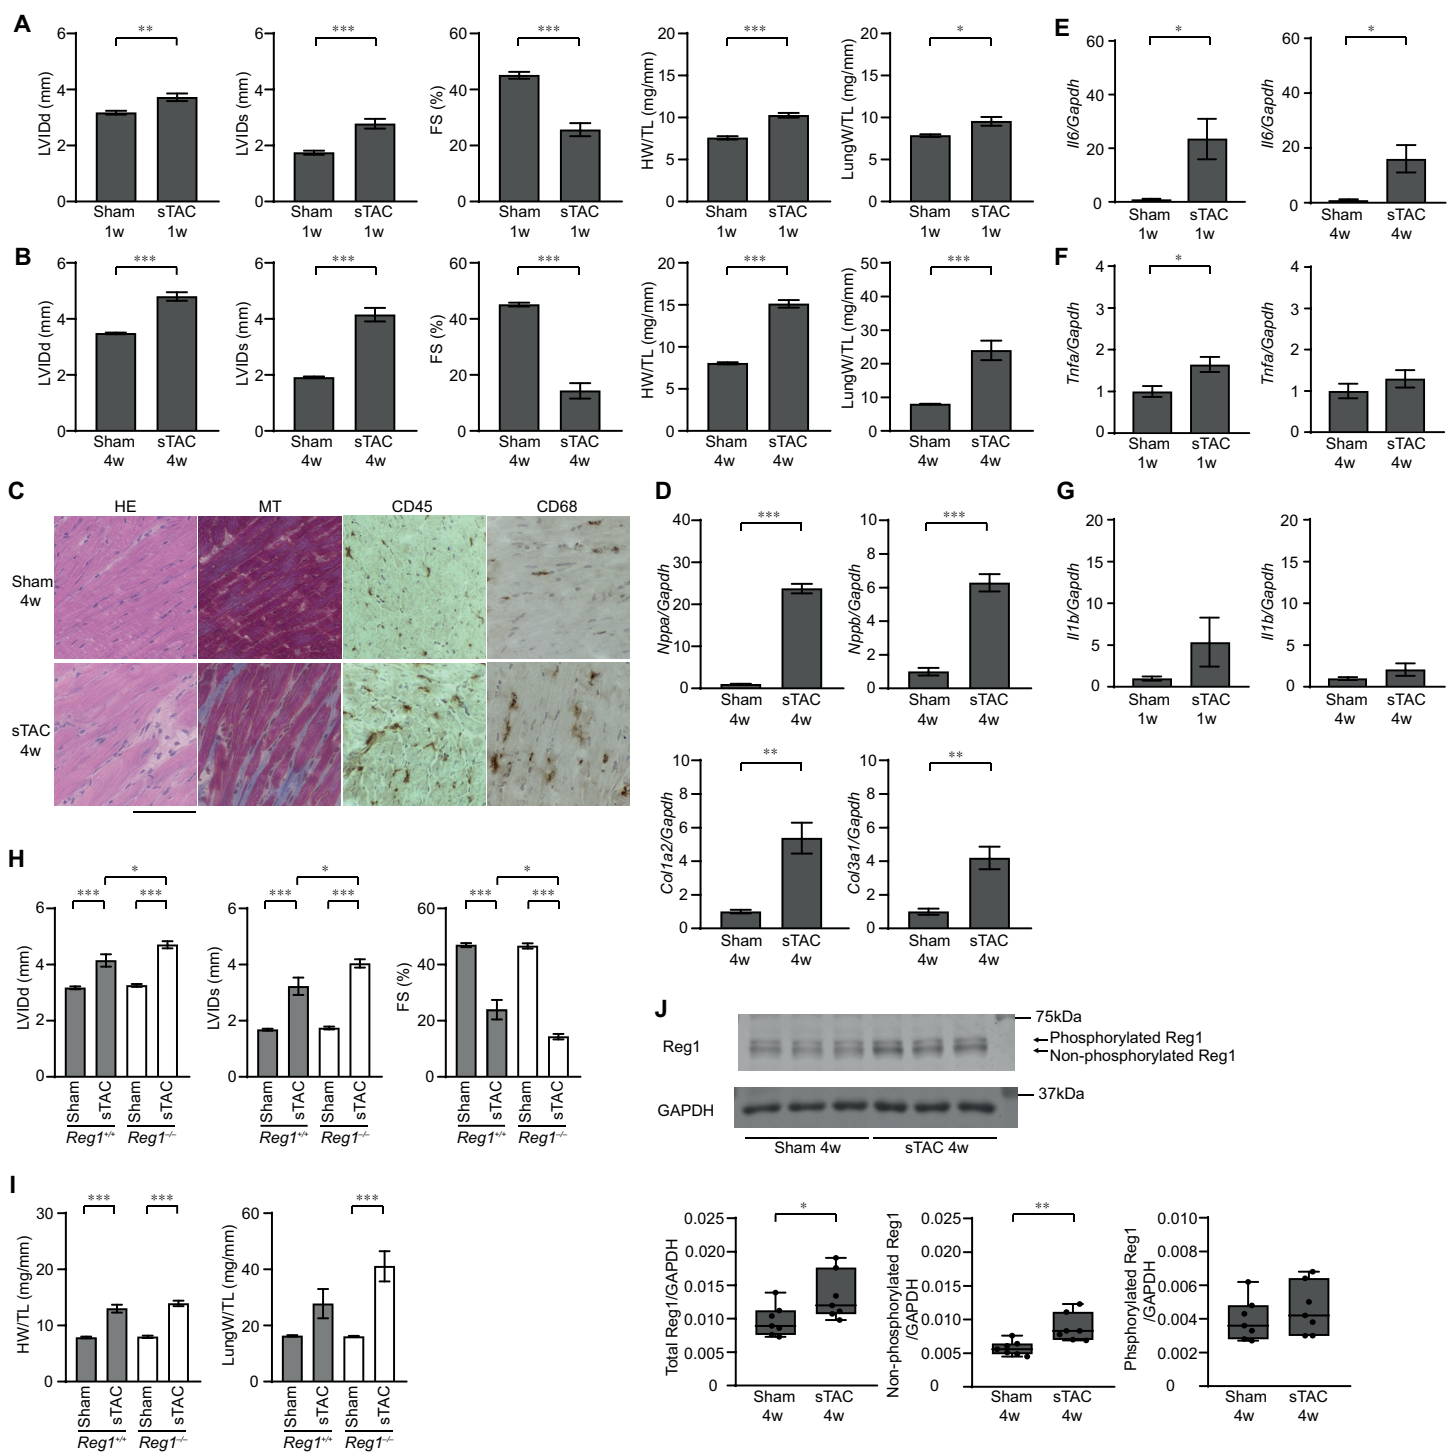

### Supplemental Figure III. Cardiac phenotypes of C57BL/6 mice subjected to severe TAC.

Data are mean  $\pm$  SEM. \* $P$ <0.05, \*\* $P$ < 0.01, \*\*\* $P$ <0.001. **A** and **B**, Echocardiographic and physiological parameters in C57BL/6 mice 1 (**A**) and 4 (**B**) weeks after severe TAC (sTAC). N=8 (sham 1w), 6 (sTAC 1w), or 12 (4w) per group. **C**, Representative images of hematoxylin-eosin-staining, Masson's trichrome staining and immunohistochemical analysis using antibodies to CD45 and CD68 4 weeks after sTAC. Scale bar, 100  $\mu$ m. **D**, mRNA expressions of *Nppa*, *Nppb*, *Col1a2*, and *Col3a1* 4 weeks after sTAC (N=5). **E-G**, mRNA expressions of inflammatory cytokines such as *Il6* (**E**), *Tnfa* (**F**), and *Il1b* (**G**) 1 or 4 weeks after sTAC (N=5). *Gapdh* mRNA was used as the loading control. The averaged value in sham-operated C57BL/6 mice was set equal to 1. **H** and **I**, The *Reg1*<sup>+/+</sup> and *Reg1*<sup>-/-</sup> mice were subjected to severe TAC (sTAC). The mice were analyzed 4 weeks after sTAC. Data were evaluated by one-way analysis of variance (ANOVA) with the Bonferroni's post hoc test. Data are mean  $\pm$  SEM. \* $P$  < 0.05. Echocardiographic (**H**) and physiological (**I**) parameters. N=10 (sham-*Reg1*<sup>+/+</sup>), 11 (sTAC-*Reg1*<sup>+/+</sup>), 11 (sham-*Reg1*<sup>-/-</sup>) or 10 (sTAC-*Reg1*<sup>-/-</sup>) per group. **J**, Regnase-1 (Reg1) protein levels in the hearts (N=7). GAPDH was used as the loading control.

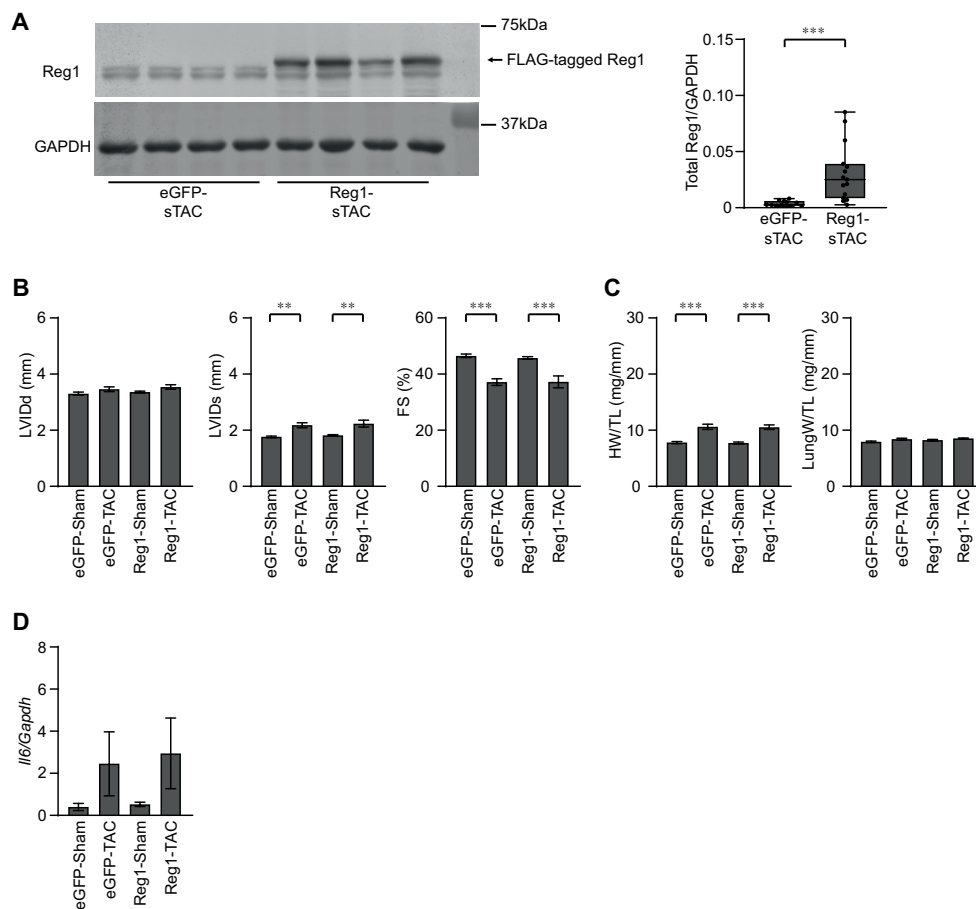

### Supplemental Figure IV. Regnase-1 protein in AAV9-infected C57BL/6 mouse hearts subjected to severe TAC and effect of Regnase-1 overexpression on TAC-induced cardiac remodeling.

Mice were analyzed 4 weeks after severe TAC (sTAC). Data are mean  $\pm$  SEM. \*\* $P < 0.01$ , \*\*\* $P < 0.001$ . **A**, Regnase-1 (Reg1) protein levels in sTAC-operated hearts infected with eGFP-AAV9 (eGFP-sTAC) or Reg1-AAV9 (Reg1-sTAC).  $N=11$  (eGFP-sTAC) or  $15$  (Reg1-sTAC). GAPDH was used as the loading control. The right graph shows signal density. **B** and **C**, Wild-type C57BL/6 mice were intraperitoneally injected with AAV9 expressing eGFP (eGFP-AAV9) or Regnase-1 (Reg1-AAV9) and were subjected to TAC 1 week after infection. Sham- or sTAC-operated wild type mice infected with eGFP-AAV9 (eGFP-sham or eGFP-TAC) or Reg1-AAV9 (Reg1-sham or Reg1-TAC) were analyzed 4 weeks after operation. Data were evaluated by one-way ANOVA with the Bonferroni's post hoc test. Data are mean  $\pm$  SEM. \* $P < 0.05$ . Echocardiographic (**B**) and physiological (**C**) parameters.  $N=9$  (eGFP-sham),  $9$  (eGFP-TAC),  $9$  (Reg1-sham) or  $9$  (Reg1-TAC). **D**, mRNA expressions of *Il6*.  $N=4$  (eGFP-sham),  $4$  (eGFP-TAC),  $4$  (Reg1-sham) or  $4$  (Reg1-TAC). *Gapdh* mRNA was used as the loading control. The averaged value in eGFP-TAC group was set equal to 1.

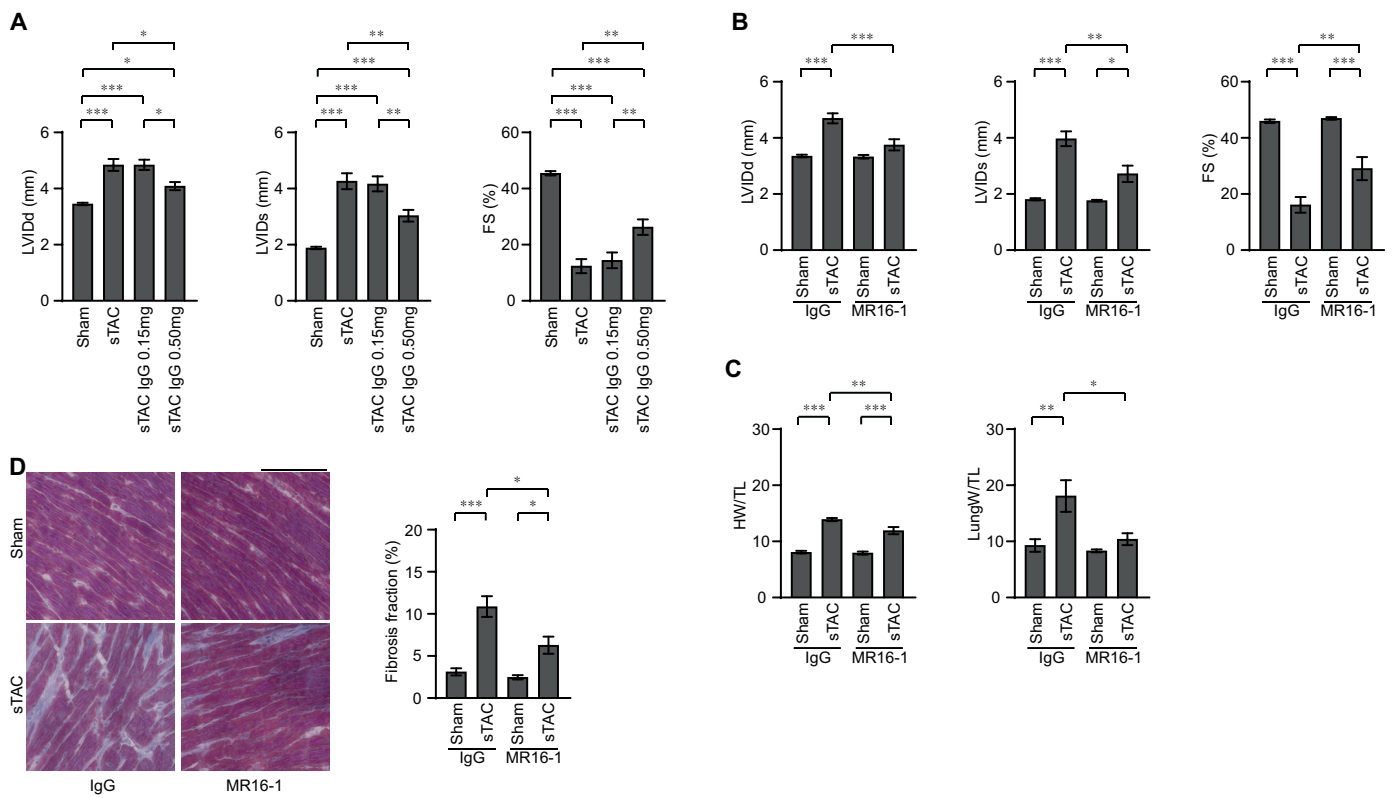

### Supplemental Figure V. IL-6 blockade ameliorated severe TAC-induced cardiomyopathy in C57BL/6 mice.

The mice were analyzed 4 weeks after severe TAC (sTAC). Data were evaluated by one-way ANOVA with the Bonferroni's post hoc test. Data are mean  $\pm$  SEM. \* $P$ <0.05, \*\* $P$ <0.01, \*\*\* $P$ <0.001. **A**, One week after sTAC operation, wild-type C57BL/6 mice received an intraperitoneal injection of 0, 0.15 or 0.5 mg control IgG once a week. Echocardiographic parameters are shown. N=7 (sham), 6 (sTAC), 7 (sTAC IgG 0.15 mg) or 7 (sTAC IgG 0.5 mg) per group. **B** and **C**, One week after sTAC operation, mice received an intraperitoneal injection of 0.15 mg anti-mouse IL-6 receptor antibody MR16-1 or control IgG once a week. Echocardiographic (**B**) and physiological (**C**) parameters. N=9 (IgG-sham), 9 (IgG-sTAC), 8 (MR16-1-sham) or 9 (MR16-1-sTAC) per group. **D**, Masson's trichrome-stained heart sections. Scale bar, 100  $\mu$ m. Fibrosis fraction was evaluated. N=4 per group.
